# Supplementary material for: Designing for Impact and Institutionalization: Applying Systems Thinking to Sustainable Postpartum Family Planning Approaches for First-Time Mothers in Bangladesh
Source: PubMed Central journal article supplement (PMC9622282; doi:10.9745/ghsp-d-22-00023), 2022-10-31
Supplement: GHSP-D-22-00023-supplement-3.pdf [file GHSP-D-22-00023-supplement-3.pdf]

**Supplement to:** Yahner M, Muriuki A, Mangieri A, Nitu S, Shafinaz S, Sarriot E. Designing for impact and institutionalization: applying systems thinking to sustainable postpartum family planning approaches for first-time mothers in Bangladesh. *Glob Health Sci Pract.* 2022;10(5):e2200023.  
<https://doi.org/10.9745/GHSP-D-22-00023>

### **Supplement 3. Practical Application of Systems Thinking in Program Intervention Design: The Intervention Viability Assessment Tool**

#### **AIM**

The purpose of this tool is to support designers and practitioners in assessing a potential program intervention to identify:

- its fit with the health system
- deal-breakers, pitfalls, and other issues for further discussion
- potential for impact

#### **SECTION 1 – INTERVENTION DESCRIPTION**

**Purpose of table:** to understand how the intervention will be implemented, by whom, where, how and the target client’s journey from identification to referral.

- Entry point: where a service provider will interact with the client (e.g., household, facility) to provide information and/or services.
- Referral point: where a service provider may send the client for additional services related to the intervention (e.g., referral to a facility for postpartum family planning (PPFP) services after a household visit, referral for treatment of malnutrition from an immunization unit)

|                                                                                                                                                                                                                 |                                                                                                     |
|-----------------------------------------------------------------------------------------------------------------------------------------------------------------------------------------------------------------|-----------------------------------------------------------------------------------------------------|
| 1. What is the proposed intervention? ( <i>briefly explain the intervention</i> )                                                                                                                               |                                                                                                     |
| 2. What outcome does the intervention aim to achieve? ( <i>state the intended outcome of the intervention</i> )                                                                                                 |                                                                                                     |
| 3. Who is the target client of this intervention? ( <i>state intended target client</i> )                                                                                                                       |                                                                                                     |
| 4. Is this intervention supported by existing evidence?                                                                                                                                                         | <input type="checkbox"/> Yes<br>Briefly explain:<br><input type="checkbox"/> No<br>Briefly explain: |
| 5. If this intervention is not supported by existing evidence, is it designed to generate evidence?                                                                                                             | <input type="checkbox"/> Yes<br>Briefly explain:<br><input type="checkbox"/> No<br>Briefly explain: |
| 6. What tools will need to be developed or adapted for the implementation of this intervention (counselling, job aids, checklists etc.)? ( <i>list the key tools, if no new tools are needed indicate N/A</i> ) | 1.<br>2.<br>3.<br>4.                                                                                |

**Supplement to:** Yahner M, Muriuki A, Mangieri A, Nitu S, Shafinaz S, Sarriot E. Designing for impact and institutionalization: applying systems thinking to sustainable postpartum family planning approaches for first-time mothers in Bangladesh. *Glob Health Sci Pract.* 2022;10(5):e2200023.

<https://doi.org/10.9745/GHSP-D-22-00023>

|                                                                                                                                                                                                    |                                                                                                                                                                                                                                               |
|----------------------------------------------------------------------------------------------------------------------------------------------------------------------------------------------------|-----------------------------------------------------------------------------------------------------------------------------------------------------------------------------------------------------------------------------------------------|
| 7. Does the intervention have additional data collection needs for monitoring beyond what is available in the national MoH health information system?                                              | <input type="checkbox"/> Yes<br>Explain if yes:<br><input type="checkbox"/> No                                                                                                                                                                |
| <b>ENTRY POINT</b>                                                                                                                                                                                 |                                                                                                                                                                                                                                               |
| 8. What is the primary entry point for this intervention where most target clients can be reached? ( <i>specify unit within the facility</i> )                                                     | <input type="checkbox"/> Household<br><input type="checkbox"/> Primary health facility<br><input type="checkbox"/> Secondary health facility<br><input type="checkbox"/> Tertiary health facility<br><input type="checkbox"/> Other – Explain |
| 9. Is this the lowest possible level where the intervention can be implemented without compromising quality?                                                                                       | <input type="checkbox"/> Yes<br><input type="checkbox"/> No                                                                                                                                                                                   |
| 10. How will the target clients be identified for specific focus at this entry point? ( <i>briefly explain</i> )                                                                                   |                                                                                                                                                                                                                                               |
| 11. What service(s), if any, related to the intervention, are already being provided to the target client at this entry point? ( <i>list services related to the intended outcome</i> )            | 1.<br>2.<br>3.<br>4.                                                                                                                                                                                                                          |
| 12. Who will provide the service(s) proposed in this intervention, to the target client, at the entry point? ( <i>name service provider(s)</i> )                                                   | 1.<br>2.<br>3.<br>4.                                                                                                                                                                                                                          |
| 13. What capacity development will the service provider(s) at the entry point require to implement the intervention? ( <i>list 4 key capacity building needs, if none is needed indicate N/A</i> ) | 1.<br>2.<br>3.<br>4.                                                                                                                                                                                                                          |
| 14. Will these services proposed in the intervention affect the workload of the provider(s) at the entry point (e.g., new tasks, more clients, longer consultation time, etc.)?                    | <input type="checkbox"/> Yes<br><input type="checkbox"/> No<br>Briefly explain:                                                                                                                                                               |
| 15. Will the services proposed in the intervention affect client flow (e.g., confusion, longer waiting times, longer consultation times etc.)?                                                     | <input type="checkbox"/> Yes<br><input type="checkbox"/> No<br>Briefly explain:                                                                                                                                                               |
| <b>REFERRAL POINT</b>                                                                                                                                                                              |                                                                                                                                                                                                                                               |

**Supplement to:** Yahner M, Muriuki A, Mangieri A, Nitu S, Shafinaz S, Sarriot E. Designing for impact and institutionalization: applying systems thinking to sustainable postpartum family planning approaches for first-time mothers in Bangladesh. *Glob Health Sci Pract.* 2022;10(5):e2200023.  
<https://doi.org/10.9745/GHSP-D-22-00023>

|                                                                                                                                                                                                                                                                   |                                                                                                                                                                                                                                               |
|-------------------------------------------------------------------------------------------------------------------------------------------------------------------------------------------------------------------------------------------------------------------|-----------------------------------------------------------------------------------------------------------------------------------------------------------------------------------------------------------------------------------------------|
| <p><b>16.</b> Will the intervention require the target client to be sent from the primary entry point to a referral point for provision of the services?<br/> <i>(If yes, please specify the unit within the referral point(s). If no, skip to section 2)</i></p> | <input type="checkbox"/> Household<br><input type="checkbox"/> Primary health facility<br><input type="checkbox"/> Secondary health facility<br><input type="checkbox"/> Tertiary health facility<br><input type="checkbox"/> Other – Explain |
| <p><b>17.</b> What service(s), related to the intervention, will be provided to the target client this referral point? <i>(list services to be provided)</i></p>                                                                                                  | <p>1.<br/>2.<br/>3.<br/>4.</p>                                                                                                                                                                                                                |
| <p><b>18.</b> Who will provide the service(s) proposed in this intervention, to the target client, at the referral point? <i>(name service provider(s))</i></p>                                                                                                   | <p>1.<br/>2.<br/>3.<br/>4.</p>                                                                                                                                                                                                                |
| <p><b>19.</b> What capacity development will the service provider(s) at the entry point require to implement the intervention? <i>(list 4 key capacity building needs, if none is needed indicate N/A)</i></p>                                                    | <p>1.<br/>2.<br/>3.<br/>4.</p>                                                                                                                                                                                                                |
| <p><b>20.</b> Will these services proposed in the intervention affect the workload of the provider at the referral point (e.g., new tasks, more clients, longer consultation time, etc.)?</p>                                                                     | <input type="checkbox"/> Yes<br><input type="checkbox"/> No<br>Briefly explain:                                                                                                                                                               |
| <p><b>21.</b> Will the services proposed in the intervention affect client flow (e.g., confusion, longer waiting times, longer consultation time etc.)?</p>                                                                                                       | <input type="checkbox"/> Yes<br><input type="checkbox"/> No<br>Briefly explain:                                                                                                                                                               |

## SECTION 2 – MANAGEMENT SYSTEMS

**Purpose of table:** To assess the viability of the intervention within the service delivery point by examining the essential elements required to provide the services required.

| <b>Essential Service Delivery Operations</b>                                                                                                                                         |                                                                                                                                                                                         |
|--------------------------------------------------------------------------------------------------------------------------------------------------------------------------------------|-----------------------------------------------------------------------------------------------------------------------------------------------------------------------------------------|
| <p>1. If the intervention is introduced, there are enough providers with the skills needed to conduct the activity(ies) and provide the service(s) proposed. <i>(check one)</i></p>  |                                                                                                                                                                                         |
| <p><b>Entry point</b></p> <input type="checkbox"/> Totally agree<br><input type="checkbox"/> Agree<br><input type="checkbox"/> Disagree<br><input type="checkbox"/> Totally disagree | <p><b>Referral point</b></p> <input type="checkbox"/> Totally agree<br><input type="checkbox"/> Agree<br><input type="checkbox"/> Disagree<br><input type="checkbox"/> Totally disagree |

**Supplement to:** Yahner M, Muriuki A, Mangieri A, Nitu S, Shafinaz S, Sarriot E. Designing for impact and institutionalization: applying systems thinking to sustainable postpartum family planning approaches for first-time mothers in Bangladesh. *Glob Health Sci Pract.* 2022;10(5):e2200023.

<https://doi.org/10.9745/GHSP-D-22-00023>

|                                                                                                                                                                                                                                                                                                                                                       |                                                                                                                                                                                                                                                                                                                                                       |
|-------------------------------------------------------------------------------------------------------------------------------------------------------------------------------------------------------------------------------------------------------------------------------------------------------------------------------------------------------|-------------------------------------------------------------------------------------------------------------------------------------------------------------------------------------------------------------------------------------------------------------------------------------------------------------------------------------------------------|
|                                                                                                                                                                                                                                                                                                                                                       |                                                                                                                                                                                                                                                                                                                                                       |
| 2. If the intervention is introduced, the current supply of essential supplies and commodities is sufficient to meet any increase in use of services. ( <i>check one</i> )                                                                                                                                                                            |                                                                                                                                                                                                                                                                                                                                                       |
| <b>Entry point</b><br><input type="checkbox"/> Totally agree<br><input type="checkbox"/> Agree<br><input type="checkbox"/> Disagree<br><input type="checkbox"/> Totally disagree<br><input type="checkbox"/> N/A                                                                                                                                      | <b>Referral point</b><br><input type="checkbox"/> Totally agree<br><input type="checkbox"/> Agree<br><input type="checkbox"/> Disagree<br><input type="checkbox"/> Totally disagree<br><input type="checkbox"/> N/A                                                                                                                                   |
| 3. The manager (or person in charge) of the service delivery point has all the required resources, information, and decision-making power to support the introduction and implementation of the intervention. ( <i>Check one</i> )                                                                                                                    |                                                                                                                                                                                                                                                                                                                                                       |
| <b>Entry point</b><br><input type="checkbox"/> Totally agree<br><input type="checkbox"/> Agree<br><input type="checkbox"/> Disagree<br><input type="checkbox"/> Totally disagree                                                                                                                                                                      | <b>Referral point</b><br><input type="checkbox"/> Totally agree<br><input type="checkbox"/> Agree<br><input type="checkbox"/> Disagree<br><input type="checkbox"/> Totally disagree                                                                                                                                                                   |
| <b>Integration and coordination of services</b>                                                                                                                                                                                                                                                                                                       |                                                                                                                                                                                                                                                                                                                                                       |
| 4. Currently, the service providers where this intervention will be implemented only provide one unique type of service e.g. only provide immunization, only provide nutrition screening and referral. ( <i>check one</i> )                                                                                                                           |                                                                                                                                                                                                                                                                                                                                                       |
| <b>Entry point</b><br><input type="checkbox"/> Totally agree (they provide only one service)<br><input type="checkbox"/> Agree (they occasionally provide other service(s))<br><input type="checkbox"/> Disagree (they often provide other service(s))<br><input type="checkbox"/> Totally disagree (they already provide highly integrated services) | <b>Entry point</b><br><input type="checkbox"/> Totally agree (they provide only one service)<br><input type="checkbox"/> Agree (they occasionally provide other service(s))<br><input type="checkbox"/> Disagree (they often provide other service(s))<br><input type="checkbox"/> Totally disagree (they already provide highly integrated services) |
| 5. <b>If they provide only one type of service</b> , substantial service reorganization (change in client flow, infrastructure, number of staff, roles of staff etc.) is required to integrate the proposed intervention ( <i>check one, explain your answer</i> )                                                                                    |                                                                                                                                                                                                                                                                                                                                                       |

**Supplement to:** Yahner M, Muriuki A, Mangieri A, Nitu S, Shafinaz S, Sarriot E. Designing for impact and institutionalization: applying systems thinking to sustainable postpartum family planning approaches for first-time mothers in Bangladesh. *Glob Health Sci Pract.* 2022;10(5):e2200023.

<https://doi.org/10.9745/GHSP-D-22-00023>

|                                                                                                                                                                                                                                                                                                                                                                                                                                                                        |                                                                                                                                                                                                                                                                                                                                                                 |
|------------------------------------------------------------------------------------------------------------------------------------------------------------------------------------------------------------------------------------------------------------------------------------------------------------------------------------------------------------------------------------------------------------------------------------------------------------------------|-----------------------------------------------------------------------------------------------------------------------------------------------------------------------------------------------------------------------------------------------------------------------------------------------------------------------------------------------------------------|
| <p><b>Entry point</b></p> <p><input type="checkbox"/>Totally agree</p> <p><input type="checkbox"/>Agree</p> <p><input type="checkbox"/>Disagree</p> <p><input type="checkbox"/>Totally disagree</p> <p>Explain:</p>                                                                                                                                                                                                                                                    | <p><b>Referral point</b></p> <p><input type="checkbox"/>Totally agree</p> <p><input type="checkbox"/>Agree</p> <p><input type="checkbox"/>Disagree</p> <p><input type="checkbox"/>Totally disagree</p> <p>Explain:</p>                                                                                                                                          |
| <p><i>Skip to the next section (Immediate Oversight of Service Delivery) if <b>all</b> services are provided at a single entry point, with no possible need for referral.</i></p> <p>6. If it may be necessary to send the client from the entry point to a referral point for provision of services, how well does coordination between providers in the two touchpoints work in order to support continuity of services? (<i>check one, explain your answer</i>)</p> | <p><input type="checkbox"/>Good, little confusion for providers and clients</p> <p><input type="checkbox"/>Fair, some confusion for providers and clients</p> <p><input type="checkbox"/>Poor, lots of confusion for providers and clients</p> <p><input type="checkbox"/>There is currently no coordination between these two touch points</p> <p>Explain:</p> |
| <p>7. What mechanisms are in place to improve coordination between the entry and referral points? (<i>list examples such as interdepartmental meetings, scheduling tools, supervision meetings between providers and community volunteers</i>)</p>                                                                                                                                                                                                                     |                                                                                                                                                                                                                                                                                                                                                                 |
| <p><b>IMMEDIATE OVERSIGHT OF SERVICE DELIVERY</b></p>                                                                                                                                                                                                                                                                                                                                                                                                                  |                                                                                                                                                                                                                                                                                                                                                                 |
| <p><b>Performance management, resource allocation and control</b></p>                                                                                                                                                                                                                                                                                                                                                                                                  |                                                                                                                                                                                                                                                                                                                                                                 |
| <p>1. Who is the designated manager immediately overseeing service delivery (in-charge)? (<i>provide title and where she/he is located</i>)</p>                                                                                                                                                                                                                                                                                                                        | <p>Entry point</p> <p>Referral point</p>                                                                                                                                                                                                                                                                                                                        |
| <p>2. If a service intervention is introduced, who will be responsible for giving service providers new and clear standard operating procedures for their work?</p>                                                                                                                                                                                                                                                                                                    | <p>Entry point</p> <p>Referral point</p>                                                                                                                                                                                                                                                                                                                        |
| <p>3. How often is the performance of providers and units reviewed and evaluated? (<i>e.g. monthly, quarterly, never</i>)</p>                                                                                                                                                                                                                                                                                                                                          | <p>Entry point</p> <p>Referral point</p>                                                                                                                                                                                                                                                                                                                        |
| <p>4. Who provides clinical supervision for providers responsible for the implementation of services and the intervention? (<i>provide title</i>)</p>                                                                                                                                                                                                                                                                                                                  | <p>Entry point</p> <p>Referral point</p>                                                                                                                                                                                                                                                                                                                        |
| <p>5. How often is supportive supervision conducted? (<i>e.g. monthly, quarterly, never</i>)</p>                                                                                                                                                                                                                                                                                                                                                                       | <p>Entry point</p> <p>Referral point</p>                                                                                                                                                                                                                                                                                                                        |
| <p><b>Planning ahead and Setting Rules and Policies</b></p>                                                                                                                                                                                                                                                                                                                                                                                                            |                                                                                                                                                                                                                                                                                                                                                                 |

**Supplement to:** Yahner M, Muriuki A, Mangieri A, Nitu S, Shafinaz S, Sarriot E. Designing for impact and institutionalization: applying systems thinking to sustainable postpartum family planning approaches for first-time mothers in Bangladesh. *Glob Health Sci Pract.* 2022;10(5):e2200023.

<https://doi.org/10.9745/GHSP-D-22-00023>

|                                                                                                                                                       |                                                                                                                                                   |
|-------------------------------------------------------------------------------------------------------------------------------------------------------|---------------------------------------------------------------------------------------------------------------------------------------------------|
| 6. Who is responsible for ensuring that staff capacity is developed/are trained and updated on new guidelines and protocols? ( <i>provide title</i> ) | Entry point<br>Referral point                                                                                                                     |
| 7. Who ensures that service staff have a clear plan for the weeks, months, and quarters ahead?                                                        | Entry point<br>Referral point                                                                                                                     |
| <b>SYSTEMS TO SUPPORT SERVICE DELIVERY</b>                                                                                                            |                                                                                                                                                   |
| 1 The management of commodities and supplies, for the intervention, is well-coordinated.                                                              | Entry point: <input type="checkbox"/> Yes <input type="checkbox"/> No<br>Referral point: <input type="checkbox"/> Yes <input type="checkbox"/> No |
| 2 There is a system for assessing and evaluating how well commodities and supplies, needed for the intervention, are managed.                         | Entry point: <input type="checkbox"/> Yes <input type="checkbox"/> No<br>Referral point: <input type="checkbox"/> Yes <input type="checkbox"/> No |
| 3 The management of information for decision making is well coordinated.                                                                              | Entry point: <input type="checkbox"/> Yes <input type="checkbox"/> No<br>Referral point: <input type="checkbox"/> Yes <input type="checkbox"/> No |

### SECTION 3 – PROGRAMMATIC DECISIONS

**Purpose of table:** To make decisions based on the information provided in the sections above

|                                                                                                                                                              |                      |
|--------------------------------------------------------------------------------------------------------------------------------------------------------------|----------------------|
| 1. What activities do you propose to strengthen management systems under the following areas: ( <i>list 4 activities under each area</i> )                   |                      |
| Improving availability of staff, commodities, and supplies                                                                                                   | 1.<br>2.<br>3.<br>4. |
| Improving the provision of services                                                                                                                          | 1.<br>2.<br>3.<br>4. |
| Improving coordination between entry and referral points                                                                                                     | 1.<br>2.<br>3.<br>4. |
| Improving supervision and support for health providers and units                                                                                             | 1.<br>2.<br>3.<br>4. |
| 2. What is currently being done (by the MoH, other partners) strengthen management systems under the areas mentioned above?                                  |                      |
| 3. What are the potential deal-breakers, or critical elements that would need to be in place for the intervention to work and are currently missing or weak? |                      |

**Supplement to:** Yahner M, Muriuki A, Mangieri A, Nitu S, Shafinaz S, Sarriot E. Designing for impact and institutionalization: applying systems thinking to sustainable postpartum family planning approaches for first-time mothers in Bangladesh. *Glob Health Sci Pract.* 2022;10(5):e2200023.  
<https://doi.org/10.9745/GHSP-D-22-00023>

|                                                                                                                                                             |                                                                                                                                                            |
|-------------------------------------------------------------------------------------------------------------------------------------------------------------|------------------------------------------------------------------------------------------------------------------------------------------------------------|
|                                                                                                                                                             |                                                                                                                                                            |
| 4. Based on the assessment, this intervention can be <b>introduced into the health system and scaled up in this context.</b> ( <i>Explain your answer</i> ) | <input type="checkbox"/> Totally agree<br><input type="checkbox"/> Agree<br><input type="checkbox"/> Disagree<br><input type="checkbox"/> Totally disagree |

Do you have any overall questions or concerns about this intervention that were not addressed in the questions above? Please note them here.
